# Supplementary material for: Understanding the mechanism of enhanced charge separation and visible light photocatalytic activity of modified wurtzite ZnO with nanoclusters of ZnS and graphene oxide: from a hybrid density functional study
Source: Royal Society of Chemistry journal article supplement (doi:10.1039/c7nj01942d), 2017-01-01
Supplement: c7nj01942d1.pdf [file c7nj01942d1.pdf]

**Understanding the mechanism of enhanced charge separation and visible light photocatalytic activity of modified wurtzite ZnO with nanoclusters of ZnS and graphene oxide: from a hybrid density functional study**

Francis Opoku<sup>a</sup>, Krishna Kuben Govender<sup>b</sup>, Cornelia Gertina Catharina Elizabeth van Sittert<sup>c</sup>, Penny Poomani Govender<sup>a,\*</sup>

<sup>a</sup> Francis Opoku

Department of Applied Chemistry, University of Johannesburg, P. O. Box 17011, Doornfontein Campus, 2028, Johannesburg, South Africa

Email: [ofrancis2010@gmail.com](mailto:ofrancis2010@gmail.com)

<sup>b</sup> Krishna Kuben Govender

Council for Scientific and Industrial Research, Meraka Institute, Center for High Performance Computing, 15 Lower Hope Road, Rosebank, Cape Town, 7700, South Africa

Email: [kgovender@csir.co.za](mailto:kgovender@csir.co.za)

<sup>c</sup> Cornelia Gertina Catharina Elizabeth van Sittert

Research Focus Area for Chemical Resource Beneficiation: Laboratory of Applied Molecular Modelling, North-West University, Potchefstroom, 2520, South Africa

Email: [cornievarsittert@nwu.ac.za](mailto:cornievarsittert@nwu.ac.za)

\*Corresponding author: Penny Poomani Govender

Department of Applied Chemistry, University of Johannesburg, P. O. Box 17011, Doornfontein Campus, 2028, Johannesburg, South Africa

Email: [pennyg@uj.ac.za](mailto:pennyg@uj.ac.za)

Tel: +27 11 559 6555

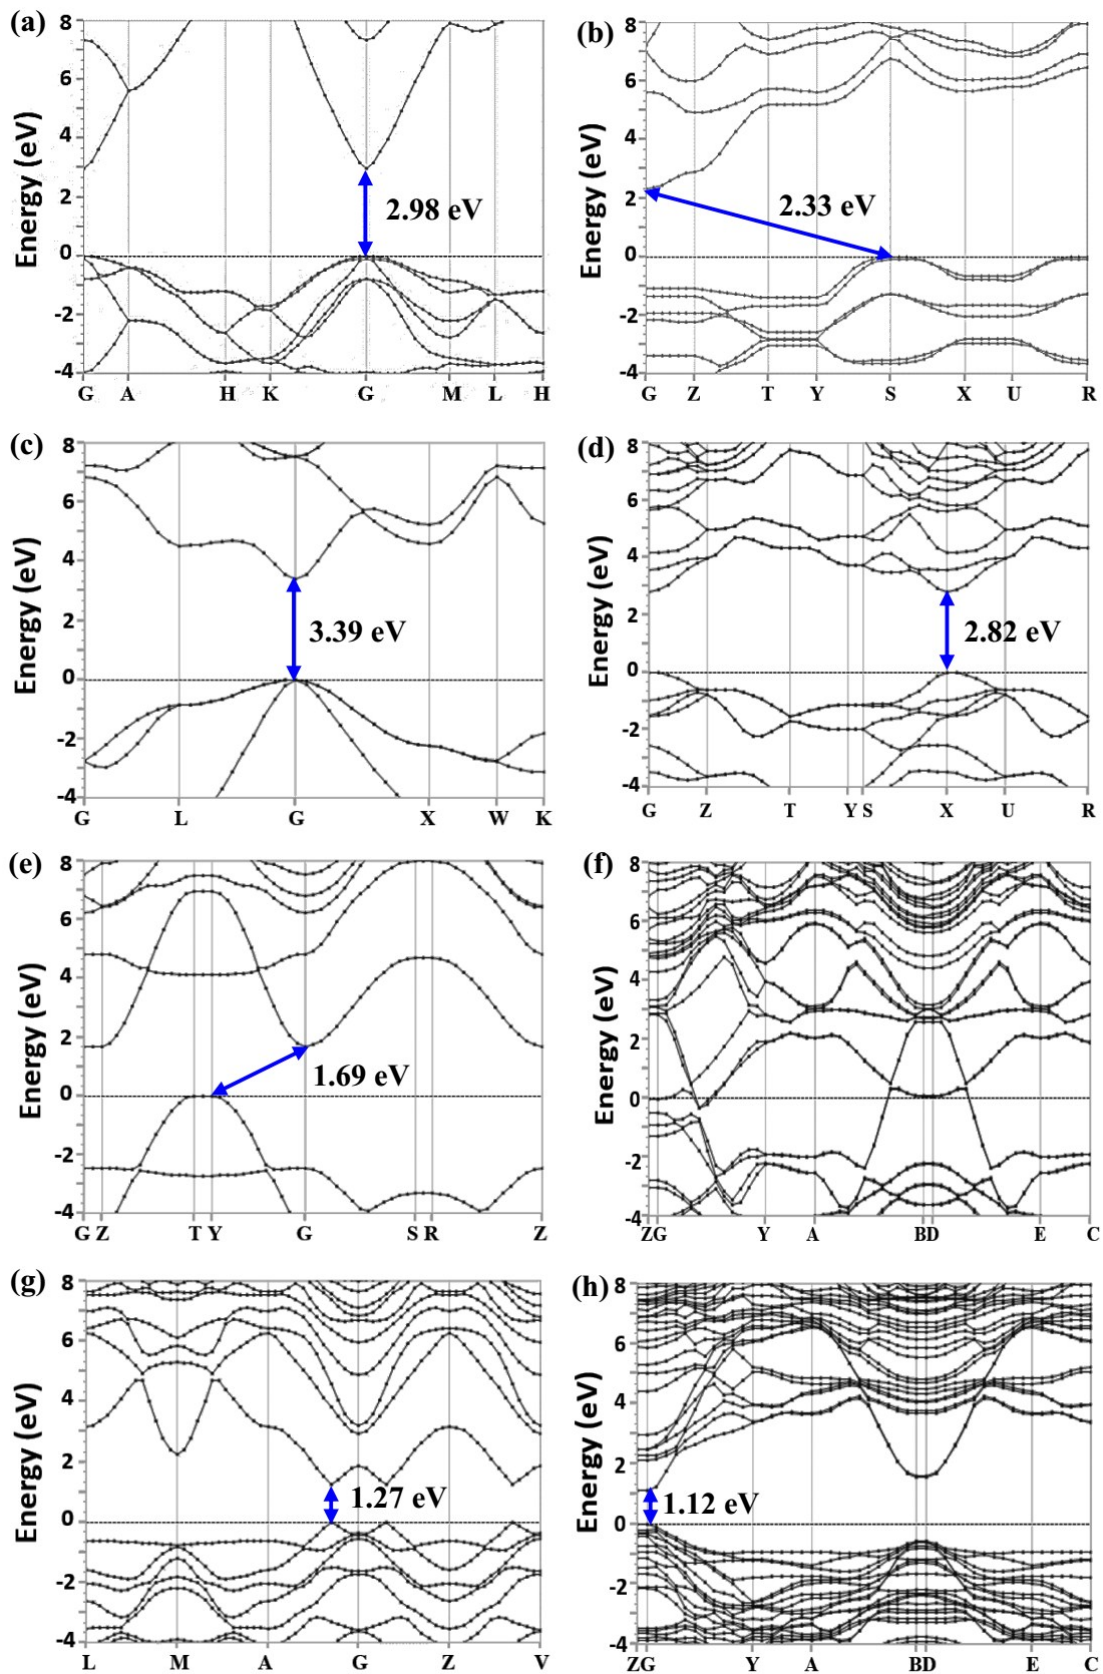

**Fig. S1** GGA-PBE calculated band structures of (a) Pure ZnO, (b) ZnO(001), (c) Pure ZnS, (d) ZnS(110), (e) GO sheet, (f) ZnS(110)/GO (g) GO/ZnO(001) and (h) ZnS(110)/GO/ZnO(001) heterostructures.

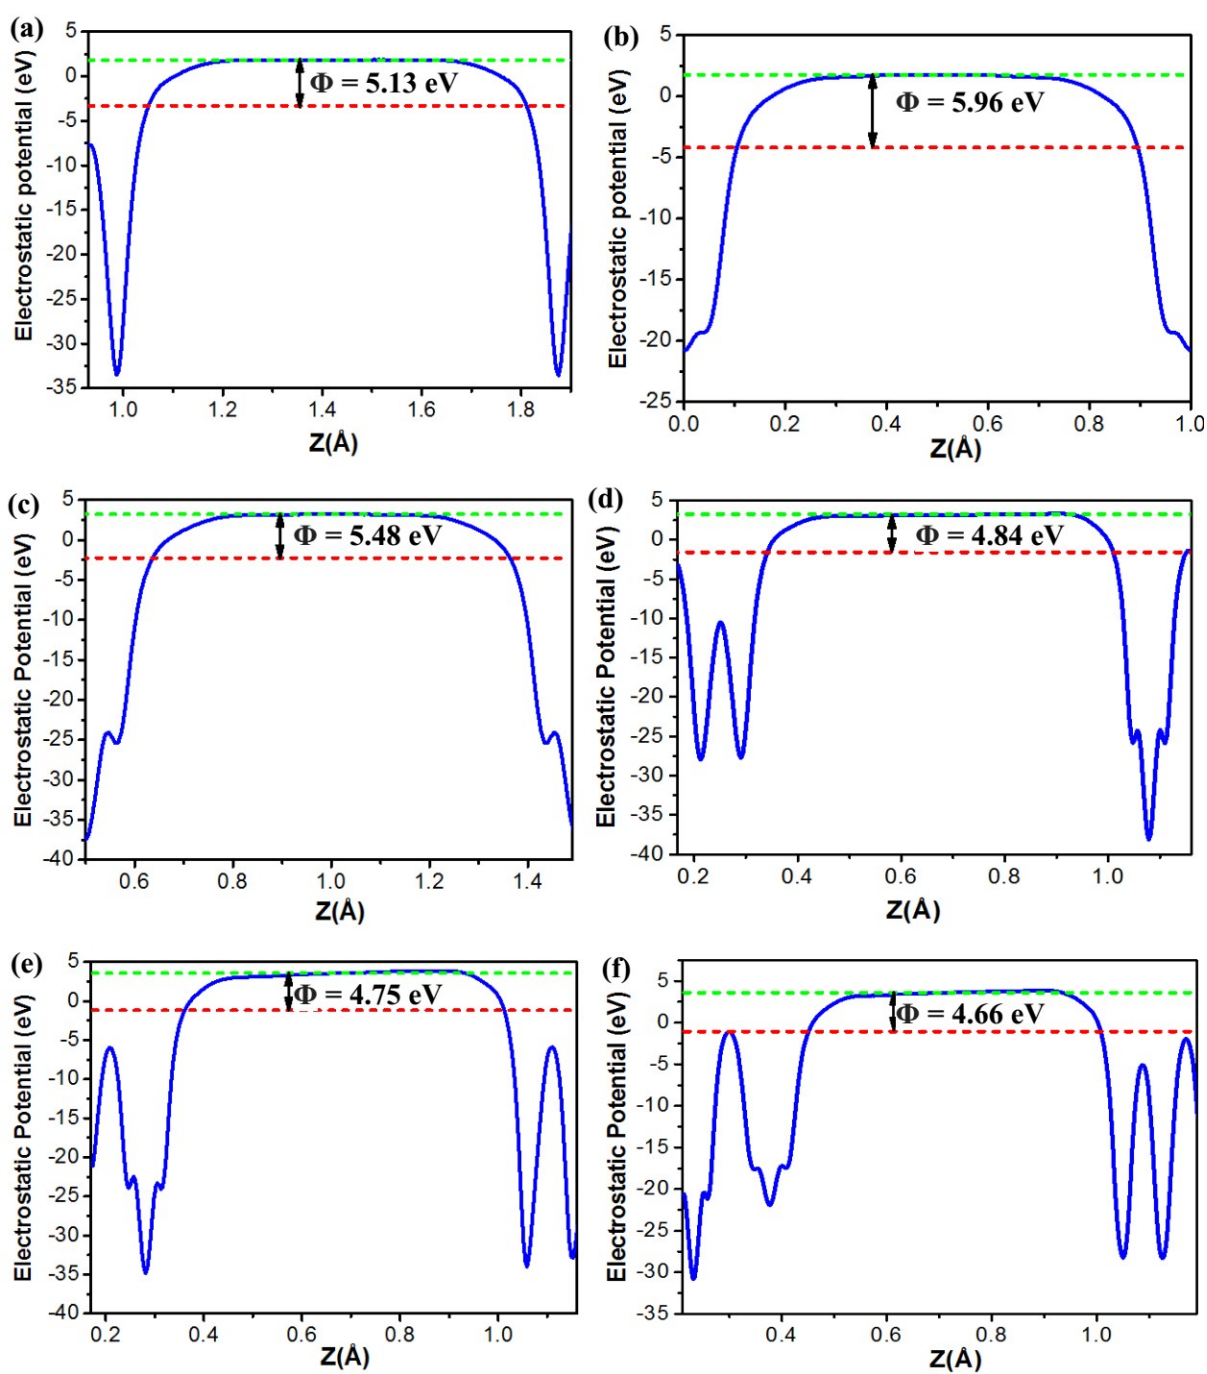

**Fig. S2** Calculated electrostatic potentials for (a) ZnO, (b) ZnS, (c) GO sheet, (d) ZnS(110)/GO, (e) GO/ZnO(001) and (f) ZnS/GO/ZnO(001) within the GGA-PBE functional. The red and green dashed lines denote the Fermi level ( $E_F$ ) and the vacuum energy ( $E_{vac}$ ) level, respectively.
